# Supplementary material for: Bimetallic Au–Ni/CSs catalysts for acetylene hydrochlorination
Source: Royal Society of Chemistry journal article supplement (doi:10.1039/c4cy00769g), 2014-07-18
Supplement: c4cy00769g1.pdf [file c4cy00769g1.pdf]

1 Bimetallic Au–Ni/CSs catalysts for acetylene hydrochlorination

2 Yanfeng Pu, Jinli Zhang, Xia Wang, Haiyang Zhang, Li Yu, Wei Li

3 (*Key Laboratory for Green Chemical Technology MOE; Key Laboratory of Systems*

4 *Bioengineering MOE, Tianjin University, Tianjin 300072, P. R. of China;*)

5 \*Corresponding Author: Tel: +86-22-27401476; Fax: +86-22-27403389

6 E-mail: [liwei@tju.edu.cn](mailto:liwei@tju.edu.cn)

7

8

9 **Supplementary Information**

10 **Table of contents:**

11 **Fig. S1.** The mass spectrometry of the Au/CSs catalyst.

12 **Fig. S2.** Au4f XPS spectra of fresh catalysts.

13 **Fig. S3.** Au4f XPS spectra of used catalysts.

14 **Table S1.** The reduction temperature center of Au species.

15 **Table S2.** Size of Au particles in Au-based catalysts, determined by  
16 XRD<sup>a</sup>.

17 **Table S3.** The relative content and binding energy of Ni species in fresh  
18 catalysts.

19

20

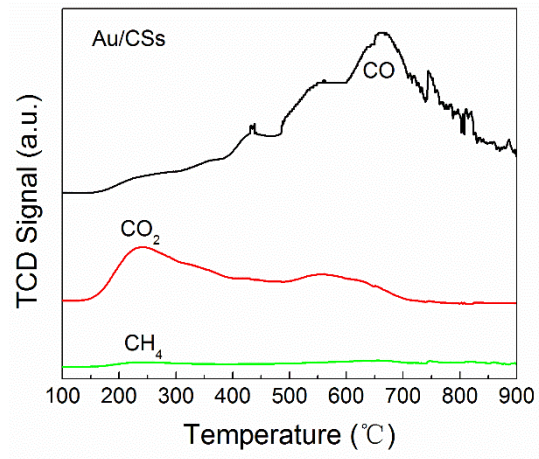

21

22 **Fig. S1.** The mass spectrometry of the Au/CSs catalyst.

23

24

25

26

27

28

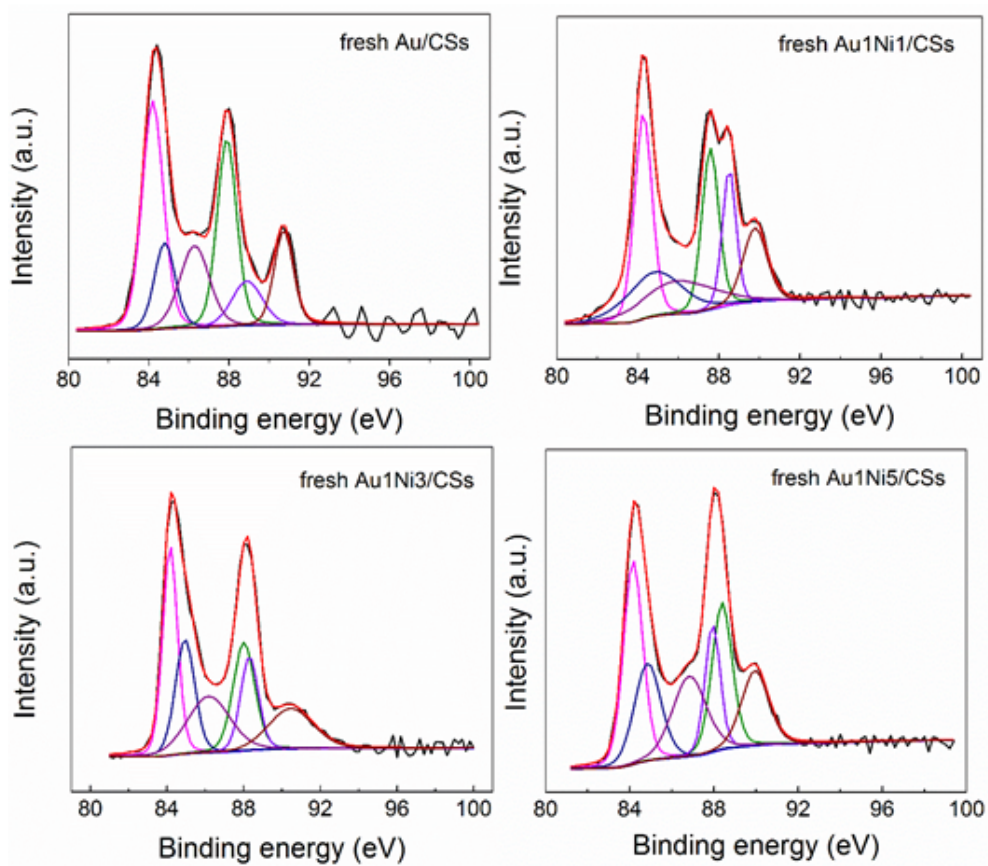

29  
 30 **Fig. S2.** Au4f XPS spectra of fresh catalysts.

31  
 32  
 33  
 34  
 35

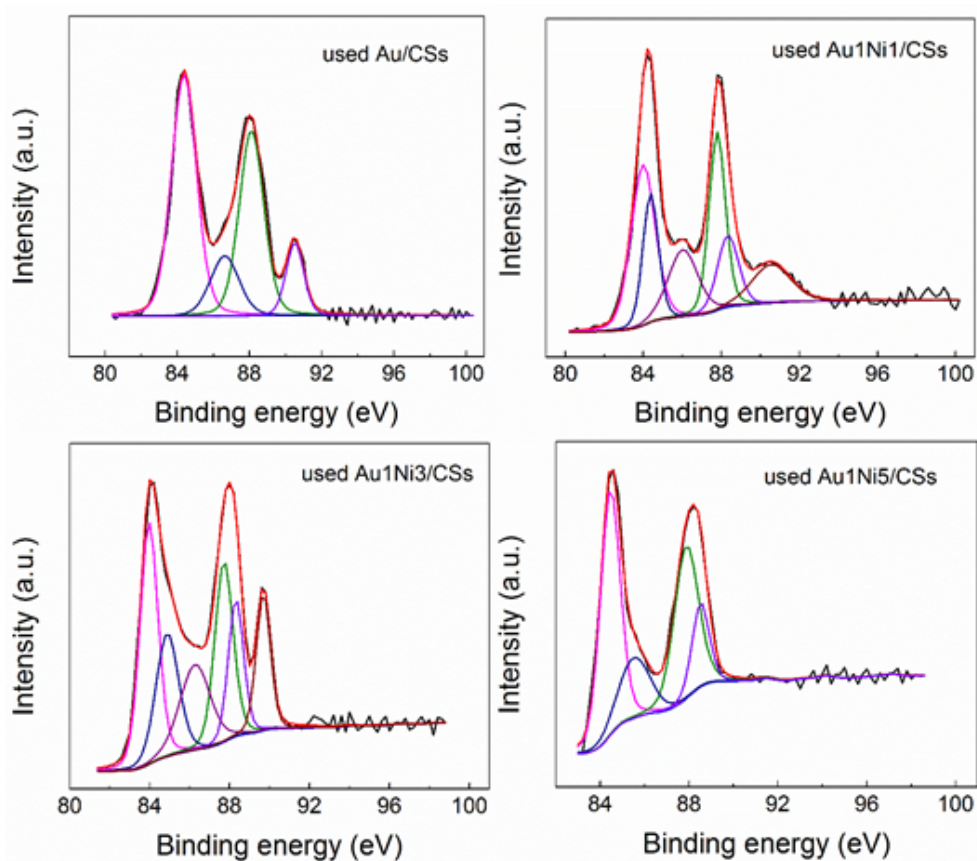

36  
 37 **Fig. S3.** Au4f XPS spectra of used catalysts.

38  
 39  
 40  
 41  
 42  
 43  
 44  
 45  
 46  
 47  
 48  
 49  
 50  
 51  
 52  
 53  
 54  
 55  
 56  
 57  
 58  
 59

60

61

62 **Table. S1.** The reduction temperature center of Au species.

63

| Catalysts        | Reduction temperature center (°C) |                 |
|------------------|-----------------------------------|-----------------|
|                  | Au <sup>3+</sup>                  | Au <sup>+</sup> |
| Fresh Au/CSs     | 310                               | /               |
| Fresh Au1Ni1/CSs | 318                               | 346             |
| Fresh Au1Ni3/CSs | 333                               | 377             |
| Fresh Au1Ni5/CSs | 315                               | 386             |

64

65

66

67

68

69

70

71

72

73

74

75

76

77

78

79

80

81

82

83

84

85

86

87

88

89

90

91

92

93

94

95

96

97 **Table. S2.** Size of Au particles in Au-based catalysts, determined by XRD<sup>a</sup>.

98

| Catalyst samples | Crystallite sizes of Au(111) (nm) |      |
|------------------|-----------------------------------|------|
|                  | fresh                             | used |
| Au/CSs           | <4 <sup>b</sup>                   | 23±2 |
| Au1Ni1/CSs       | <4 <sup>b</sup>                   | 12±2 |
| Au1Ni3/CSs       | <4 <sup>b</sup>                   | 8±2  |
| Au1Ni5/CSs       | <4 <sup>b</sup>                   | 21±2 |

<sup>a</sup> Error estimated from XRD peak broadening of 0.06° at the Au (111) reflection at 38.36° (2θ).

<sup>b</sup> It was not possible to assign any error band below 4 nm, as this size is below the XRD method

99

100

101

102

103

104

105

106

107

108

109

110

111

112

113

114

115

116

117

118 **Table.S3.** The relative content and binding energy of Ni species in fresh catalysts.

119

| Sample          | Ni%, Binding Energy (eV) |                 |                 |                       |                                    |
|-----------------|--------------------------|-----------------|-----------------|-----------------------|------------------------------------|
|                 | Ni <sup>0</sup> (%)      | NiO (%)         | sat NiO (%)     | NiCl <sub>2</sub> (%) | Ni <sub>2</sub> O <sub>3</sub> (%) |
| FreshAu1Ni1/CSs | 7.58 (853.0eV)           | 25.55 (854.6eV) | /               | 39.05 (856.0eV)       | 27.82 (857.1eV)                    |
| FreshAu1Ni3/CSs | 20.92 (853.2eV)          | 29.04 (854.6eV) | 31.98 (855.5eV) | 18.06 (856.2eV)       | /                                  |
| FreshAu1Ni5/CSs | /                        | /               |                 | 69.17 (856.1eV)       | 30.83 (857.1eV)                    |

120

121
